# Supplementary material for: Methane dry reforming over hydrotalcite-derived Ni–Mg–Al mixed oxides: the influence of Ni content on catalytic activity, selectivity and stability
Source: Royal Society of Chemistry journal article supplement (doi:10.1039/c6cy00906a), 2016-01-01
Supplement: c6cy00906a1.pdf [file c6cy00906a1.pdf]

## Electronic Supplementary Information (ESI)

**Table S1.** Summary of Ni/Mg/Al hydrotalcite-based catalytic systems tested in dry reforming of methane.

| Type of catalysts                                                                     | Method of hydrotalcite synthesis                                                                                      | Cations in brucite-like layers                         | Ni/Mg or Ni loading (%)    | M <sup>II</sup> /M <sup>I</sup> " | Calcination conditions              | Ref .     |
|---------------------------------------------------------------------------------------|-----------------------------------------------------------------------------------------------------------------------|--------------------------------------------------------|----------------------------|-----------------------------------|-------------------------------------|-----------|
| Mixed oxides derived from Ni/Al and Ni/Mg/Al hydrotalcites                            | Co-precipitation at constant pH                                                                                       | Ni <sup>2+</sup> , Mg <sup>2+</sup> , Al <sup>3+</sup> | 1, 0.2                     | 2, 3                              | No data                             | 27        |
| Mixed oxides derived from Ni/Mg/Al hydrotalcites; Ni supported on Mg/Al hydrotalcites | Solid phase crystallization                                                                                           | Ni <sup>2+</sup> , Mg <sup>2+</sup> , Al <sup>3+</sup> | 1/2                        | 3                                 | 650, 850°C, 14 h                    | 28        |
|                                                                                       | Impregnation of Ni <sup>2+</sup> on Mg/Al hydrotalcite                                                                | Mg <sup>2+</sup> , Al <sup>3+</sup>                    | 25.1 wt.%Ni                | 3                                 |                                     |           |
| Mixed oxides derived from Ni/Mg/Al hydrotalcites                                      | Co-precipitation at constant pH                                                                                       | Ni <sup>2+</sup> , Mg <sup>2+</sup> , Al <sup>3+</sup> | 1/5, 1/3, 1                | 6, 4, 2, 2/3, 2/5                 | 500°C, 10 h                         | 29        |
| Mixed oxides derived from Ni/Al hydrotalcites                                         | Co-precipitation at constant pH                                                                                       | Ni <sup>2+</sup> , Al <sup>3+</sup>                    | -                          | 2, 3, 5, 8, 10                    | 300, 400, 500, 600, 700, 800°C, 6 h | 30        |
| Mixed oxides derived from Ni/Al hydrotalcite precursors                               | Co-precipitation at constant pH                                                                                       | Ni <sup>2+</sup> , Al <sup>3+</sup>                    | -                          | 4                                 | 550°C, 4 h                          | 31        |
| Mixed oxides derived from Ni/Mg/Al hydrotalcites                                      | Co-precipitation at constant pH                                                                                       | Ni <sup>2+</sup> , Mg <sup>2+</sup> , Al <sup>3+</sup> | 0.5, 1, 2, 5               | 0.4, 0.9, 2                       | 400, 600, 800°C, 6 h                | 32        |
| Ni supported on MgAl <sub>2</sub> O <sub>4</sub> spinels derived from hydrotalcites   | Co-precipitation at constant pH                                                                                       | Ni <sup>2+</sup> , Mg <sup>2+</sup> , Al <sup>3+</sup> | 1, 3, 5, 10, 15 wt.% Ni    | nd                                | 900°C, 5 h                          | 33        |
| Mixed oxides derived from Ni/Mg/Al hydrotalcites                                      | Sol-gel method                                                                                                        | Ni <sup>2+</sup> , Mg <sup>2+</sup> , Al <sup>3+</sup> | 4, 15 19 wt.%Ni            | nd                                | 500, 650°C, 5 h                     | 34        |
| Mixed oxides phase derived from Ni/Mg/Al hydrotalcites                                | Co-precipitation at constant pH                                                                                       | Ni <sup>2+</sup> , Mg <sup>2+</sup> , Al <sup>3+</sup> | 3, 6, 9, 12, 15, 18 wt.%   | 3                                 | 800°C, 5 h                          | 39        |
| Nickel introduced into Mg/Al hydrotalcites                                            | Co-precipitation with [Ni(EDTA)] <sup>2-</sup> chelate                                                                | Mg <sup>2+</sup> , Al <sup>3+</sup>                    | -                          | 3                                 | 500°C, 16 h                         | 35        |
| Nickel introduced into Mg/Al hydrotalcites                                            | Co-precipitation with [Ni(EDTA)] <sup>2-</sup> chelate                                                                | Mg <sup>2+</sup> , Al <sup>3+</sup>                    | 1/7                        | 3.5                               | 500°C, 16 h                         | 36        |
|                                                                                       | Anion-exchange reaction of NO <sub>3</sub> <sup>-</sup> of MgAl-NO <sub>3</sub> with [Ni(EDTA)] <sup>2-</sup> chelate | Mg <sup>2+</sup> , Al <sup>3+</sup>                    | 1/11                       | 3.3                               |                                     |           |
|                                                                                       | Reconstruction of LDH structure for Mg/Al mixed oxide in an aqueous solution of [Ni(EDTA)] <sup>2-</sup>              | Mg <sup>2+</sup> , Al <sup>3+</sup>                    | 1/11                       | 3.6                               |                                     |           |
|                                                                                       | Co-precipitation at constant pH                                                                                       | Mg <sup>2+</sup> , Al <sup>3+</sup>                    | 1/5                        | 2.5                               |                                     |           |
|                                                                                       | Impregnation of Ni <sup>2+</sup> on Mg/Al hydrotalcite                                                                | Mg <sup>2+</sup> , Al <sup>3+</sup>                    | 25.1 wt.%Ni                | 3                                 |                                     |           |
| Mixed oxides derived from Ni/Al and Mg/Al hydrotalcites                               | Co-precipitation at constant pH                                                                                       | Ni <sup>2+</sup> , Al <sup>3+</sup>                    | 63.5 wt.%                  | 4                                 | 550°C, 4 h                          | 37        |
|                                                                                       | Nickel introduced via adsorption from aqueous solution of [Ni(EDTA)] <sup>2-</sup> chelate                            | Mg <sup>2+</sup> , Al <sup>3+</sup>                    | 0.8 wt.%                   | 3                                 |                                     |           |
| Mixed oxides phase derived from Ni/Mg/Al hydrotalcites                                | Co-precipitation at constant pH                                                                                       | Ni <sup>2+</sup> , Mg <sup>2+</sup> , Al <sup>3+</sup> | 2.94                       | 2                                 | 350, 600, 800, 1000°C               | 38        |
| Mixed oxides phase derived from Ni/Mg/Al hydrotalcites                                | Surfactant-assisted co-precipitation at constant pH                                                                   | Ni <sup>2+</sup> , Mg <sup>2+</sup> , Al <sup>3+</sup> | 10 wt.%                    | 3                                 | 700°C, 6 h                          | 40        |
| Mixed oxides phase derived from Ni/Al and Ni/Mg/Al hydrotalcite precursors            | Co-precipitation at constant pH                                                                                       | Ni <sup>2+</sup> , Mg <sup>2+</sup> , Al <sup>3+</sup> | 4, 12, 20, 36, 49, 59 wt.% | 3                                 | 550°C for 4 h in air                | This work |

**Table S2.** Summary of Ni/Mg/Al hydrotalcite-based catalytic systems tested in dry reforming of methane.

| Catalyst | Ni (wt.%) | Mg (wt.%) | Al (wt.%) | Ni/Mg*      | M <sup>II+</sup> /M <sup>III+</sup> ** | S <sub>BET</sub> (m <sup>2</sup> /g) | V <sub>tot</sub> (cm <sup>3</sup> /g) |
|----------|-----------|-----------|-----------|-------------|----------------------------------------|--------------------------------------|---------------------------------------|
| HT-100Ni | 58.66     | -         | 8.92      | -           | 3.02 (3.0)                             | 121                                  | 0.24                                  |
| HT-75Ni  | 49.10     | 6.57      | 10.9      | 3.09 (3.0)  | 2.74 (3.0)                             | 127                                  | 0.29                                  |
| HT-50Ni  | 36.59     | 14.79     | 11.07     | 1.02 (1.0)  | 3.00 (3.0)                             | 126                                  | 0.35                                  |
| HT-25Ni  | 19.57     | 23.85     | 11.76     | 0.34 (0.33) | 3.02 (3.0)                             | 115                                  | 0.41                                  |
| HT-15Ni  | 12.27     | 30.96     | 13.23     | 0.16 (0.18) | 3.02 (3.0)                             | -                                    | -                                     |
| HT-5Ni   | 2.79      | 37.98     | 15.24     | 0.03 (0.06) | 2.94 (3.0)                             | -                                    | -                                     |
| HT-MgAl  | -         | 37.42     | 4.15      | -           | 2.98 (3.0)                             | 95                                   | 0.84                                  |
